# Supplementary material for: Intravenously Administered Human Umbilical Cord-Derived Mesenchymal Stem Cell (HucMSC) Improves Cardiac Performance following Infarction via Immune Modulation
Source: Stem Cells Int. 2023 Mar 17;2023:6256115. doi: 10.1155/2023/6256115 (PMC10038737; doi:10.1155/2023/6256115)

**supplementary information**

**Intravenously administered** **human umbilical cord-derived mesenchymal stem cell (HucMSC) improves cardiac performance following infarction via immune modulation**

Xiaoting Liang†1, 2, Jing Liu†1, 2, 3, Mimi Li1, 4, Fang Lin1, 4, Rulin Zhuang1, 5, Qingshu Meng1, 4, Xiaoxue Ma1, 4, Yuanfeng Xin1, 5, Xin Gong6, 7, Zhiying He2, 7, Wei Han6, 7, Xiaohui Zhou*1, 4, Zhongmin Liu*1, 4, 5, 7

†Dr. Liang and Dr. Liu contributed equally to this work.

1. Research Center for Translational Medicine, Shanghai East Hospital, Tongji University School of Medicine, Shanghai 200120, P.R. China;
2. Institute for Regenerative Medicine, Shanghai East Hospital, School of Life Sciences and Technology, Tongji University, Shanghai 200120, P.R. China;
3. Department of Burn & Plastic Surgery, Beijing Children's Hospital, Capital Medical University, National Center for Children's Health, Beijing, 100045, P.R. China;
4. Shanghai Heart Failure Research Center, Shanghai East Hospital, Tongji University School of Medicine, Shanghai 200120, P.R. China;

5. Department of Cardiovascular Surgery, Shanghai East Hospital, Tongji University School of Medicine, Shanghai 200120, P.R. China;

6. Department of Heart Failure, Shanghai East Hospital, Tongji University School of Medicine, Shanghai 200120, P.R. China;

7. Shanghai Institute of Stem Cell Research and Clinical Translation, Shanghai 200120, China

* To whom correspondence should be addressed:

Xiaohui Zhou, M.D., Ph.D.

Research Center for Translational Medicine,

Shanghai East Hospital, Tongji University School of Medicine

150 Jimo Rd, Pudong, Shanghai, 200120, China

Tel:86-21-61569884

E-mail: zxh100@tongji.edu.cn

Zhongmin Liu, M.D., Ph.D.

Research Center for Translational Medicine,

Department of Cardiovascular Surgery,

Shanghai East Hospital, Tongji University School of Medicine

150 Jimo Rd, Pudong, Shanghai, 200120, China

E-mail: [liu.zhongmin@tongji.edu.cn](mailto:liu.zhongmin@tongji.edu.cn)

**Figure legend**

**supplementary Figure 1.** Characterization of HucMSC. A) Surface marker profile of HucMSC at passage 4. B) Trilineage differentiation capacity (adipogenesis, osteogenesis, chondrogenesis) of HucMSC at passage 4.

**supplementary Figure 2.** Representative hematoxylin-eosin staining images of main organs at 28 days after MI and HucMSC administration. n = 3~4 mice for each group. scale bar = 200 μm.

**supplementary Figure 3.** A) Gating strategy and representative images of flow cytometry in the spleen at 7 days post-MI. B) Gating strategy and representative images of flow cytometry in the med-LN at 7 days post-MI.

**supplementary Figure 4.** Serum levels of IL2, IL5, IL6 and TNF-α at 7 days post MI were measure by protein array. n = 3~4 mice for each group. ns, non-significant vs MI group.


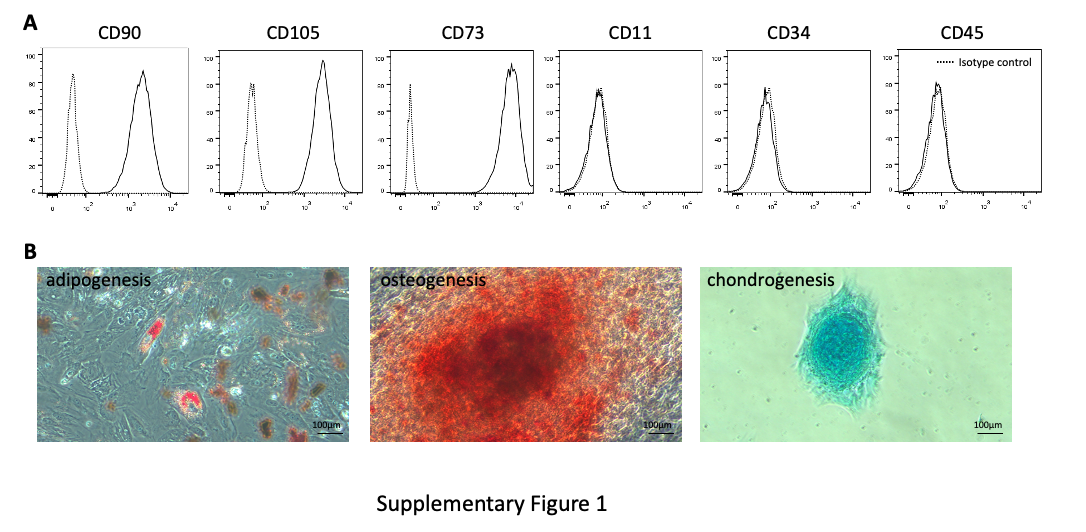


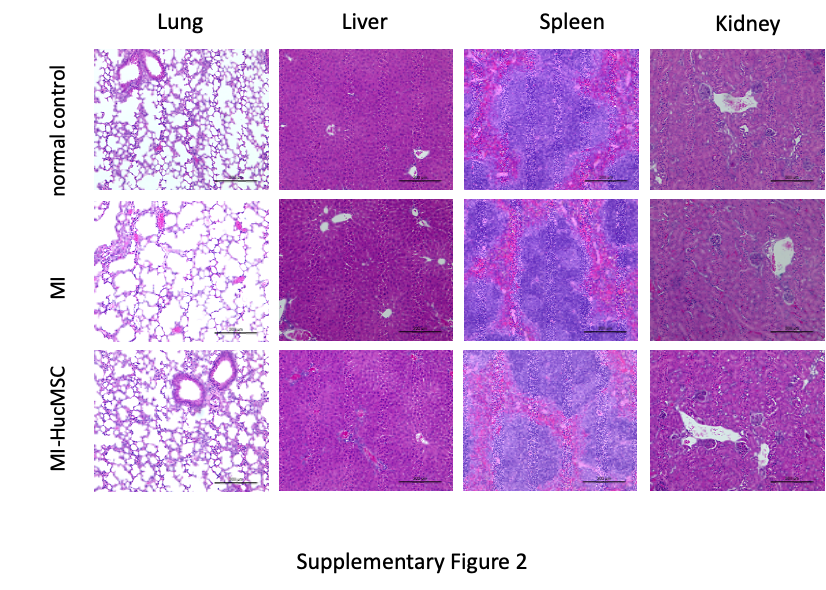


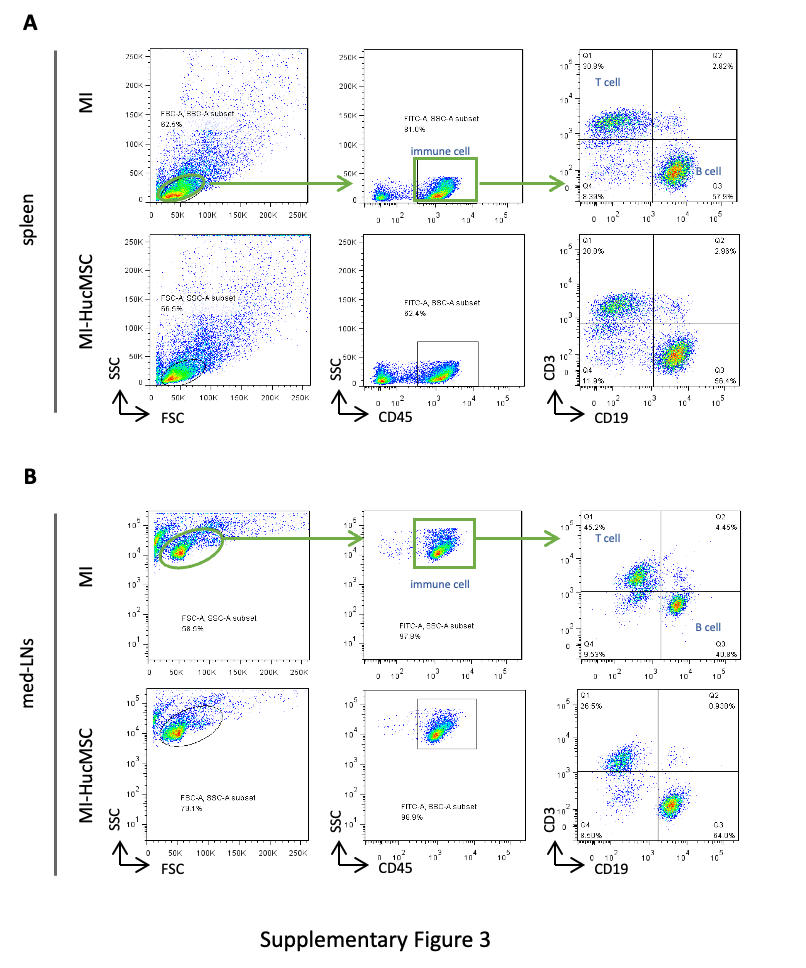


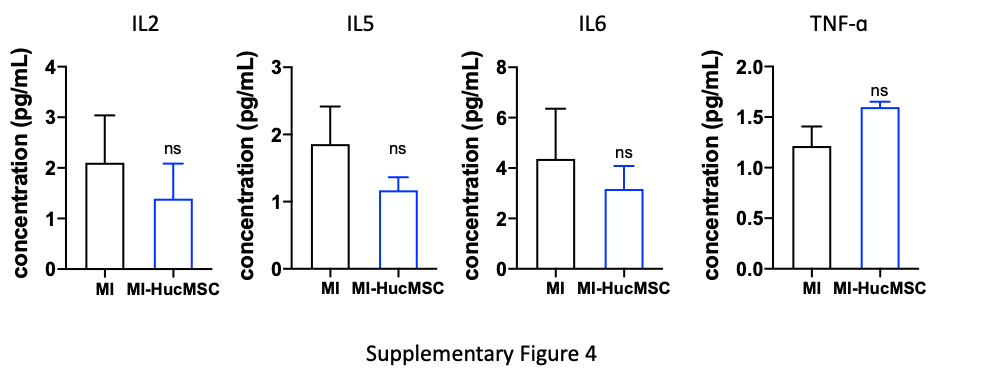

Supplement: Supplementary Materials — Supplementary Figure 1: characterization of HucMSC. A) Surface marker profile of HucMSC at passage 4. B) Trilineage differentiation capacity (adipogenesis, osteogenesis, chondrogenesis) of HucMSC at passage 4. Supplementary Figure 2: representative hematoxylin-eosin staining images of main organs at 28 days after MI and HucMSC administration. n = 3 ~ 4 mice for each group. Scale bar = 200 μm. Supplementary Figure 3: A) gating strategy and representative images of flow cytometry in the spleen at 7-day post-MI. B) Gating strategy and representative images of flow cytometry in the med-LN at 7-day post-MI. Supplementary Figure 4: serum levels of IL2, IL5, IL6, and TNF-α at 7-day post-MI were measure by protein array. n = 3 ~ 4 mice for each group. ns, non-significant vs. MI group. [file 6256115.f1.docx]
